# Supplementary material
Source: PubMed Central journal article supplement (PMC9150686)
Supplement: JSLHR-65-843-s001.pdf [file JSLHR-65-843-s001.pdf]

**Supplemental Material S1.**

**Table S1a.** Detailed subject information for participants from University of Nebraska.

| Subject | Age <sup>1</sup> | Sex | Mean PPC <sup>2</sup> | Overall Mean Intelligibility Rating | Overall Mean Severity Rating | Total CAS Signs | Total Unique CAS Signs | Receptive Language Standard Score <sup>3</sup> | GFTA <sup>4</sup> Raw Score | GFTA Standard Score |
|---------|------------------|-----|-----------------------|-------------------------------------|------------------------------|-----------------|------------------------|------------------------------------------------|-----------------------------|---------------------|
| GP001   | 7;0              | M   | 93.6                  | 96.4                                | 4.4                          | 41              | 6                      | 115                                            | 15                          | 78                  |
| GP003   | 8;6              | M   | 79.2                  | 82.6                                | 30.1                         | 41              | 6                      | 98                                             | 25                          | 41                  |
| GP004   | 13;0             | M   | 95.3                  | 99.4                                | 5.1                          | 79              | 7                      | 133                                            | 7                           | 74                  |
| GP005   | 8;11             | M   | 87.8                  | 93.1                                | 14.8                         | 26              | 9                      | 85                                             | 18                          | 58                  |
| GP008   | 9;0              | M   | 89.3                  | 98.5                                | 5.9                          | 47              | 7                      | 111                                            | 11                          | 73                  |
| GP009   | 9;7              | M   | 84.5                  | 95.2                                | 10.4                         | 33              | 7                      | 99                                             | 12                          | 70                  |
| GP015   | 17;0             | M   | 94.0                  | 99.0                                | 4.9                          | 51              | 7                      | 98                                             | 9                           | 50                  |
| GP017   | 5;0              | M   | 72.1                  | 91.6                                | 25.2                         | 23              | 7                      | 73                                             | 31                          | 71                  |
| GP018   | 13;0             | M   | 86.5                  | 97.3                                | 30.3                         | 83              | 7                      | 121                                            | 27                          | 40                  |
| GP019   | 8;0              | M   | 79.2                  | 95.8                                | 19.6                         | 51              | 8                      | 85                                             | 22                          | 55                  |
| GP022   | 9;0              | M   | 95.1                  | 98.7                                | 4.8                          | 78              | 6                      | 78                                             | 15                          | 61                  |
| GP031   | 4;0              | M   | 83.0                  | 98.5                                | 13.7                         | 30              | 10                     | 90                                             | 26                          | 82                  |
| GP041   | 12;0             | M   | 81.8                  | 99.0                                | 10.4                         | 67              | 5                      | 54                                             | 6                           | 82                  |
| GP046   | 8;0              | M   | 84.8                  | 99.2                                | 14.2                         | 65              | 8                      | 82                                             | 14                          | 69                  |
| GP052   | 6;0              | M   | 66.1                  | 79.9                                | 54.0                         | 65              | 11                     | 93                                             | 40                          | 48                  |
| GP059   | 10;0             | M   | 81.8                  | 96.7                                | 23.6                         | 161             | 9                      | 50                                             | 22                          | 40                  |
| GP061   | 12;0             | M   | 86.1                  | 98.3                                | 13.7                         | 90              | 8                      | 44                                             | 11                          | 63                  |
| GP065   | 8;0              | M   | 80.3                  | 98.7                                | 19.1                         | 88              | 8                      | 111                                            | 26                          | 40                  |
| GP067   | 12;0             | M   | 86.3                  | 99.4                                | 9.0                          | 75              | 9                      | 46                                             | 27                          | 40                  |
| GP069   | 12;4             | M   | 92.3                  | 100.0                               | 5.2                          | 68              | 8                      | 50                                             | 9                           | 71                  |

**Table S1b.** Detailed subject information for participants from Miami University.

| Subject | Age <sup>1</sup> | Sex | Mean PPC <sup>2</sup> | Overall Mean Intelligibility Rating | Overall Mean Severity Rating | Total CAS Signs | Total Unique CAS Signs | Receptive Language Standard Score <sup>3</sup> | GFTA <sup>4</sup> Raw Score | GFTA Standard Score |
|---------|------------------|-----|-----------------------|-------------------------------------|------------------------------|-----------------|------------------------|------------------------------------------------|-----------------------------|---------------------|
| MU-1    | 11;1             | F   | 91.2                  | 97.1                                | 4.7                          | 23              | 4                      | 78                                             | 7                           | 85                  |
| MU-2    | 3;11             | M   | 50.9                  | 26.6                                | 86.4                         | 184             | 11                     | 33^                                            | 55                          | 64                  |
| MU-3    | 7;1              | F   | 73.4                  | 90.2                                | 33.6                         | 87              | 7                      | 96                                             | 29                          | 76                  |
| MU-4    | 6;8              | M   | 79.6                  | 93.7                                | 16.1                         | 71              | 9                      | 78                                             | 26                          | 62                  |
| MU-5    | 5;7              | M   | 48.1                  | 41.7                                | 82.4                         | 201             | 11                     | 67                                             | 54                          | 40                  |
| MU-6    | 9;7              | M   | 43.1                  | 21.8                                | 91.3                         | 183             | 10                     | 48                                             | 45                          | 40                  |
| MU-7    | 7;8              | F   | 79.4                  | 83.0                                | 29.9                         | 97              | 10                     | 76                                             | 26                          | 55                  |
| MU-8    | 7;1              | M   | 32.0                  | 8.2                                 | 94.8                         | 206             | 10                     | 48                                             | 58                          | 40                  |
| MU-9    | 10;1             | M   | 88.2                  | 96.2                                | 9.0                          | 41              | 9                      | 80                                             | 10                          | 75                  |
| MU-10   | 4;10             | M   | 49.6                  | 45.4                                | 73.7                         | 133             | 8                      | 61^                                            | 49                          | 56                  |

<sup>1</sup>Age is listed as yr;mo.

<sup>2</sup>PPC: Percent phonemes correct from GFTA responses.

<sup>3</sup>Receptive Language Standard Score: Standard score from full CELF (UNL participants), CELF RLI (8 MU participants), or converted standard score from Mullen Scales of Early Learning, Receptive Language Subtest (2 MU participants, indicated with ^).

<sup>4</sup>GFTA: Goldman-Fristoe Test of Articulation, 2<sup>nd</sup> Ed.
