# Supplementary material
Source: PubMed Central journal article supplement (PMC9150686)
Supplement: JSLHR-65-843-s002.pdf [file JSLHR-65-843-s002.pdf]

**Supplemental Material S2.**

**Table S2a.** CAS sign information for participants from University of Nebraska.

| Subject | Consonant Error | Voicing Error | Nasality | Vowel Error | Intrusive Schwa | Syllable Segmentation | Stress Error | Slow Rate | Difficulty with Transitions | Groping | Variable Errors | Additions |
|---------|-----------------|---------------|----------|-------------|-----------------|-----------------------|--------------|-----------|-----------------------------|---------|-----------------|-----------|
| UNL-1   | 12              | 11            | 0        | 5           | 0               | 0                     | 5            | 1         | 2                           | 1       | 4               | 0         |
| UNL-2   | 44              | 3             | 0        | 22          | 1               | 0                     | 3            | 0         | 0                           | 0       | 6               | 0         |
| UNL-3   | 7               | 6             | 0        | 6           | 2               | 1                     | 3            | 0         | 1                           | 0       | 0               | 0         |
| UNL-4   | 11              | 9             | 1        | 6           | 1               | 1                     | 2            | 0         | 1                           | 1       | 0               | 0         |
| UNL-5   | 24              | 15            | 1        | 4           | 2               | 0                     | 4            | 0         | 1                           | 0       | 0               | 0         |
| UNL-6   | 8               | 3             | 0        | 2           | 2               | 2                     | 5            | 0         | 0                           | 0       | 1               | 0         |
| UNL-7   | 72              | 26            | 2        | 31          | 2               | 1                     | 5            | 5         | 5                           | 2       | 10              | 0         |
| UNL-8   | 41              | 6             | 2        | 5           | 0               | 1                     | 3            | 1         | 1                           | 0       | 6               | 1         |
| UNL-9   | 33              | 1             | 0        | 6           | 2               | 5                     | 3            | 0         | 1                           | 0       | 0               | 0         |
| UNL-10  | 49              | 9             | 2        | 8           | 1               | 2                     | 2            | 0         | 2                           | 0       | 0               | 0         |
| UNL-11  | 16              | 10            | 0        | 14          | 1               | 0                     | 3            | 0         | 0                           | 0       | 3               | 0         |
| UNL-12  | 60              | 6             | 1        | 11          | 0               | 0                     | 3            | 0         | 1                           | 0       | 1               | 0         |
| UNL-13  | 42              | 15            | 0        | 9           | 0               | 3                     | 3            | 0         | 3                           | 1       | 2               | 0         |
| UNL-14  | 12              | 5             | 0        | 3           | 4               | 0                     | 4            | 0         | 0                           | 2       | 0               | 0         |
| UNL-15  | 35              | 9             | 3        | 14          | 0               | 0                     | 4            | 0         | 0                           | 0       | 0               | 0         |
| UNL-16  | 40              | 9             | 1        | 4           | 1               | 0                     | 5            | 0         | 3                           | 0       | 2               | 0         |
| UNL-17  | 57              | 5             | 2        | 6           | 1               | 2                     | 2            | 0         | 8                           | 0       | 7               | 0         |
| UNL-18  | 50              | 9             | 3        | 15          | 0               | 1                     | 2            | 0         | 2                           | 0       | 6               | 0         |
| UNL-19  | 32              | 16            | 1        | 8           | 1               | 1                     | 6            | 0         | 0                           | 1       | 2               | 0         |
| UNL-20  | 12              | 11            | 0        | 5           | 0               | 0                     | 5            | 1         | 2                           | 1       | 4               | 0         |

**Table S2b.** CAS sign information for participants from Miami University.

| Subject | Consonant Error | Voicing Error | Nasality | Vowel Error | Intrusive Schwa | Syllable Segmentation | Stress Error | Slow Rate | Difficulty with Transitions | Groping | Variable Errors | Additions |
|---------|-----------------|---------------|----------|-------------|-----------------|-----------------------|--------------|-----------|-----------------------------|---------|-----------------|-----------|
| MU-1    | 19              | 0             | 1        | 1           | 0               | 0                     | 2            | 0         | 0                           | 0       | 0               | 0         |
| MU-2    | 113             | 16            | 1        | 13          | 6               | 8                     | 5            | 7         | 4                           | 0       | 5               | 6         |
| MU-3    | 60              | 9             | 1        | 10          | 0               | 2                     | 3            | 2         | 0                           | 0       | 0               | 0         |
| MU-4    | 30              | 13            | 0        | 10          | 3               | 0                     | 4            | 1         | 2                           | 0       | 4               | 4         |
| MU-5    | 115             | 5             | 3        | 18          | 3               | 14                    | 5            | 23        | 3                           | 0       | 8               | 4         |
| MU-6    | 103             | 22            | 1        | 22          | 0               | 10                    | 9            | 11        | 1                           | 0       | 2               | 2         |
| MU-7    | 50              | 10            | 3        | 9           | 3               | 6                     | 3            | 6         | 4                           | 0       | 3               | 0         |
| MU-8    | 131             | 5             | 25       | 21          | 3               | 5                     | 7            | 6         | 0                           | 0       | 2               | 1         |
| MU-9    | 17              | 8             | 0        | 6           | 1               | 1                     | 4            | 2         | 0                           | 0       | 1               | 1         |
| MU-10   | 96              | 4             | 3        | 21          | 0               | 0                     | 6            | 1         | 0                           | 0       | 1               | 1         |
